# Supplementary material
Source: Royal Society of Chemistry journal article supplement (doi:10.1039/d6se00347h)
Supplement: d6se00347h1.pdf [file d6se00347h1.pdf]

## Supplementary Information

### Side Chain Engineered Ether-Free Polybenzimidazole Membranes with Enhanced Proton Transport and Stability for PEM Water Electrolysis

Prashant Upadhyay<sup>1,2</sup>, Shubham Mishra<sup>1,2</sup>, Sarthak Mishra<sup>1,2</sup>, Aniket Hota<sup>1</sup>, Pankaj D Indurkar<sup>1,2</sup>, Vaibhav Kulshrestha<sup>1,2</sup>\*

<sup>1</sup>Council of Scientific and Industrial Research-Central Salt & Marine Chemicals Research Institute (CSIR-CSMCRI), Bhavnagar, Gujarat, India-364002

<sup>2</sup>Academy of Scientific & Innovative Research (AcSIR), Ghaziabad, Uttar Pradesh India-201002

\*Email: [vaibhavk@csmcri.res.in](mailto:vaibhavk@csmcri.res.in); [vaibhavphy@gmail.com](mailto:vaibhavphy@gmail.com)

#### SI-1. Determination of physicochemical and electrochemical parameters of the membrane

*Water uptake:* 2.0 × 2.0 cm<sup>2</sup> membranes piece was vacuum dried for 24h and weighed in its dry condition. The dry membrane was then immersed in distilled water for the next 24h to absorb the maximum water possible. The water uptake was calculated using equation:

$$WU (\%) = \frac{W_{Wet} - W_{Dry}}{W_{Dry}} \times 100$$

Here,  $W_{Wet}$  &  $W_{Dry}$  are the wet and dry weight of membranes.

*Swelling ratio* of membranes was measured in terms of change in volume of membrane under wet and dry conditions and calculated using following equation:

$$Sr (\%) = \frac{V_{Wet} - V_{Dry}}{V_{Dry}} \times 100$$

Where,  $V_{Wet}$  and  $V_{Dry}$  are the wet and dry volume of membrane samples respectively.

*Ion exchange capacity* describes the amount of exchangeable ionic groups induced per unit dry of membrane weight. For IEC, 2 × 2 cm<sup>2</sup> membrane pieces with known dry weight were immersed in 0.1M HCl for 24h for complete protonation. Afterwards, membrane pieces were removed from HCl solution washed thoroughly with D.I water to remove extra H<sup>+</sup> ion and equilibrated in 0.1M NaCl for 24 h under the similar environmental conditions and the equilibrated solution was titrated against 0.01 M NaOH solution using phenolphthalein as

indicator to measure the amount of Na<sup>+</sup> liberated in the solution, the endpoint was detected by visualizing the appearance of pale pink color. Three replications of exchanging and regeneration were carried out to gain steady value. The IEC is calculated from below equation:

$$IEC (meq g^{-1}) = \frac{V_{NaOH} \times C_{NaOH}}{W_{dry}}$$

Where  $V_{NaOH}$  is the volume of NaOH consumed,  $C_{NaOH}$  is the concentration of NaOH solution, and  $W_{dry}$  is the dry weight of the membrane sample. The average of the three cycles is mentioned here.

The degrees of sulfonation of prepared membranes were calculated using equation :

$$DOS (\%) = \frac{\frac{I_{SO_3H}}{G_{protons}}}{\frac{I_{SO_3H}}{G_{protons}} + \frac{I_{Ar.H}}{T_{Ar.H}}} \times 100$$

Where  $I_{SO_3H}$ , integral value of -SO<sub>3</sub>H chain,  $G_{protons}$  is the number of protons grafted,  $I_{Ar.H}$  and  $T_{Ar.H}$  are integral values and total number of aromatic protons, respectively.

The impedance was measured by sandwiching membrane samples (2 cm × 2 cm) between the electrodes and applying DC and sinusoidal AC at a scanning rate of 1 μA s<sup>-1</sup>. The specimen's resistance ( $R$ ) at room temperature was assessed using Nyquist plots that made use of fit and simulation approaches. The  $\kappa^m$  of the prepared PEMs was assessed using the following equation:

$$\kappa^m (S cm^{-1}) = \frac{L(cm)}{R(\Omega) \times A(cm^2)}$$

Where,  $L$  (cm) is thickness, and  $A$  (cm<sup>2</sup>) is the effective area of the membrane.

The  $E_a$  for the AEMs was calculated from their respective Arrhenius plots. The slope of the straight Arrhenius curve (b) was evaluated and the  $E_a$  was calculated using the following equation.

$$E_a = -b \times R$$

Where b is the slope and R is the gas constant (8.314 J/mol/K).

The degradation rate of membranes were calculated using equation:

$$R_d(mV h^{-1}) = \frac{V_f - V_i}{t}$$

$V_f =$  final cell potential

$V_i =$  initial cell potential

$t =$  operation time

| Membrane     | FPBI<br>(mmol) | NaH<br>(mmol) | Butane sultone<br>(mmol) |
|--------------|----------------|---------------|--------------------------|
| FPBI-g-BS-21 | 1.77           | 8.33          | 3.67                     |
| FPBI-g-BS-43 | 1.77           | 8.33          | 7.34                     |

**Table S1.** Varying the

concentration of grafting of butane sultone on FPBI

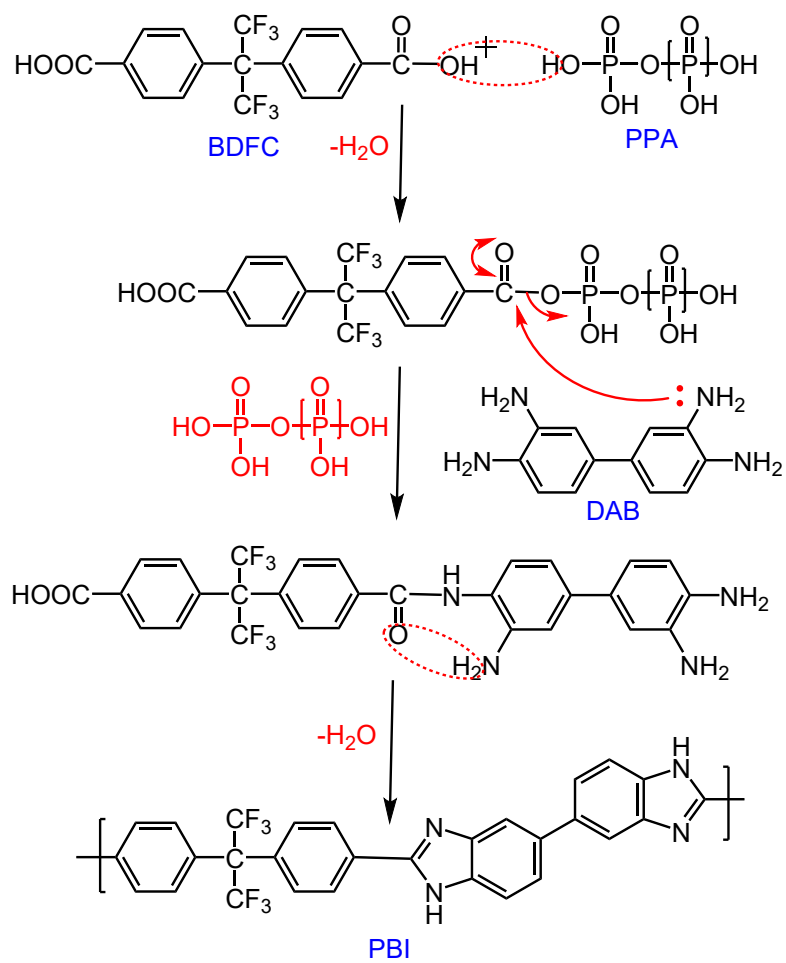

**Scheme S1.** Mechanism of synthesis of polybenzimidazole polymer.

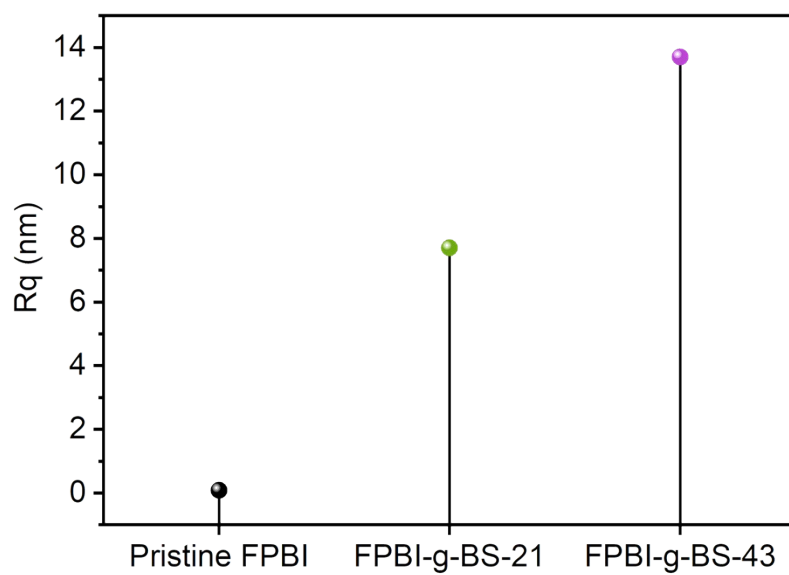

**Figure S1.** Root-mean square (Rq) roughness of fabricated membranes.

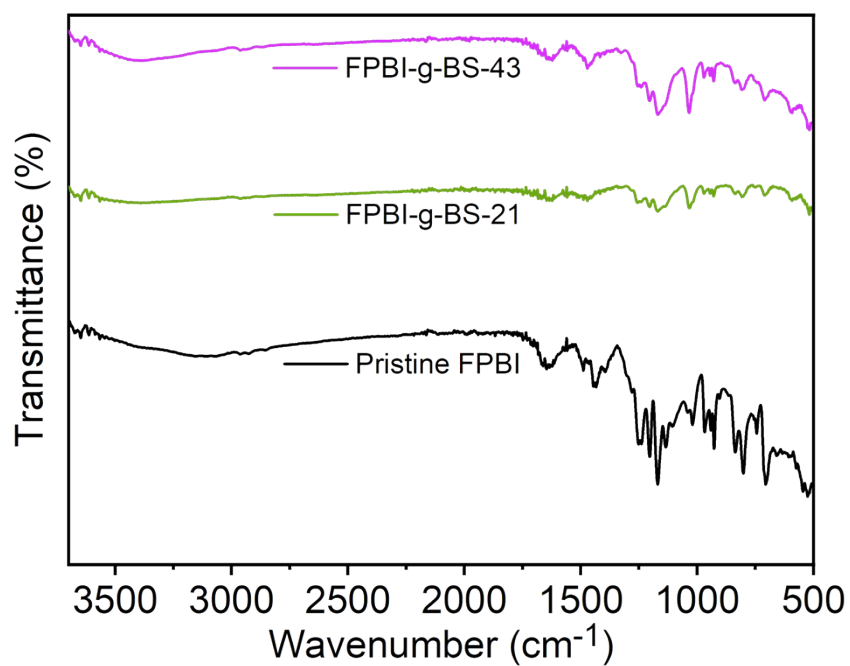

**Figure S2.** FTIR spectra of membranes after experiment of oxidative stability.

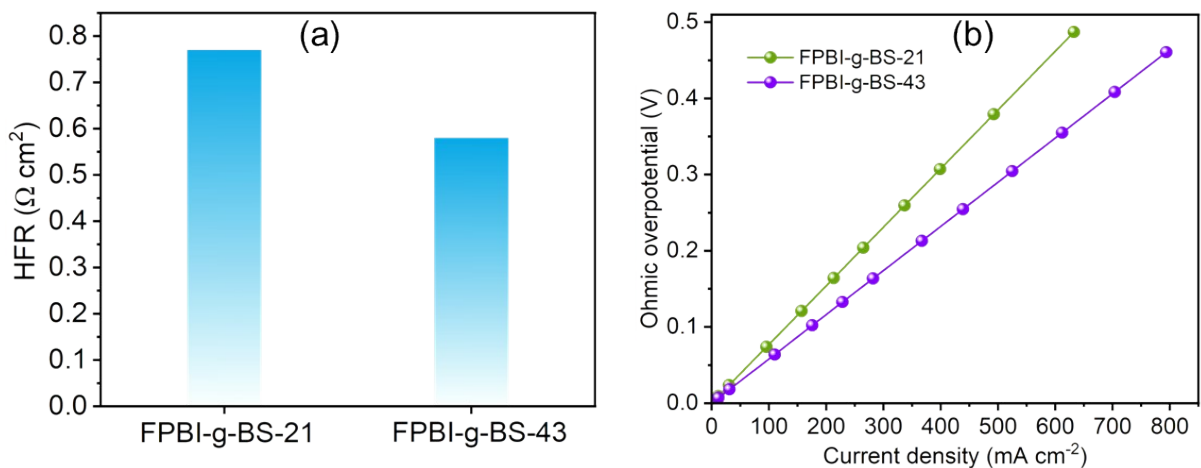

**Figure S3** (a) High frequency resistance (HFR) and (b) ohmic overpotential analysis of fabricated membranes.

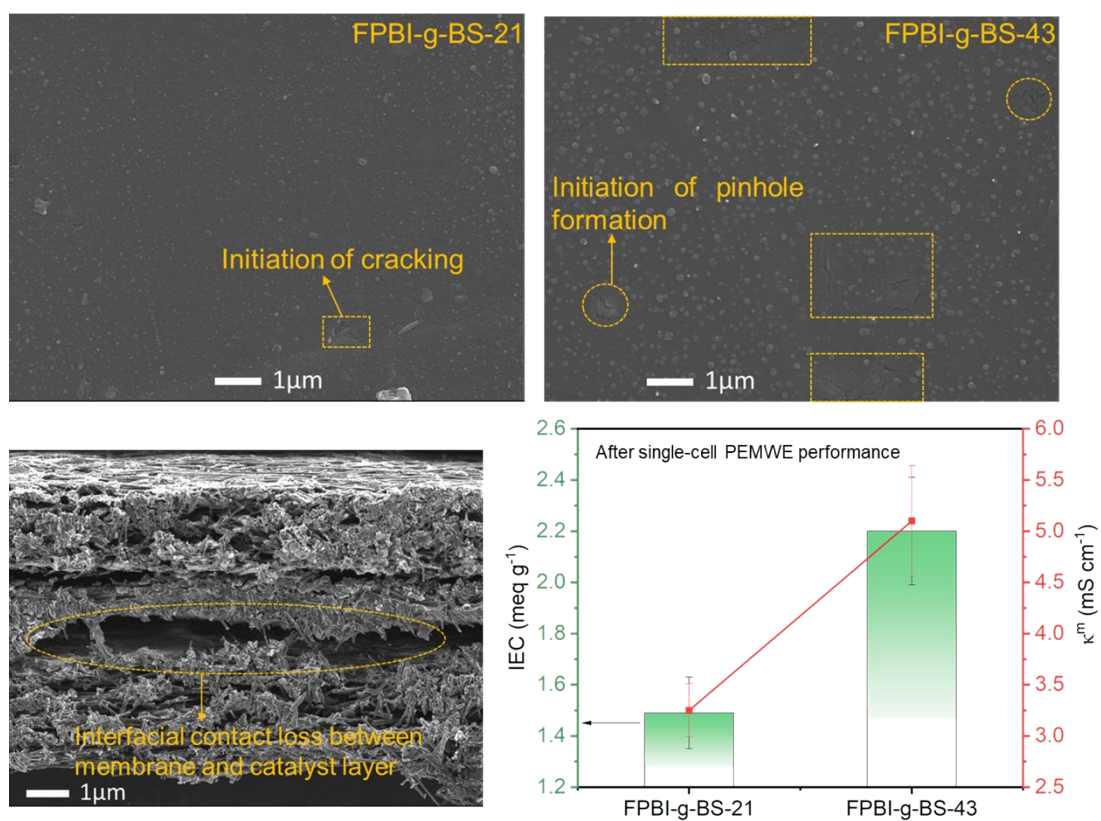

**Figure S4.** Post analysis of designed membranes: surface and cross-sectional images using FE-SEM techniques and electrochemical properties (IEC and  $\kappa^m$ ).

**Reference:**

1. Mishra, S., Upadhyay, P., Sharma, J., Kumar, P., & Kulshrestha, V. Materials Today Chemistry, 47, 2025, 102822.
